# Supplementary material for: Identification of siRNA delivery enhancers by a chemical library screen
Source: PubMed Central journal article supplement — Nucleic Acids Res. 2015 Jul 28;43(16):7984–8001. doi: 10.1093/nar/gkv762 (PMC4652771; doi:10.1093/nar/gkv762), 2015-07-28
Supplement: supp_gkv762_nar-00953-y-2015-File009.pdf [file supp_gkv762_nar-00953-y-2015-File009.pdf]

## Supplementary figure legends

**Figure S1: Chemical structure of the identified enhancers.** Chemical structures of compounds #1 to #24 (a), #25 to #48 (b) and #49 to #50 (c).

**Figure S2: Determination of cytotoxicity based on cell number.** Cell number was determined during the primary screen done in HeLa cells for LNPs (a) or Chol-siRNAs (b). Cell number was determined during the screen performed in human primary fibroblasts for LNPs (c) or Chol-siRNAs (d), and in mouse primary hepatocytes for LNPs (e) or Chol-siRNAs (f). Note that the compounds order in the present graphs are similar to those of the figures 2 and 3.

**Figure S3: PD739 and PD740 are transfection reagent.** (a) Z-score of GFP intensity versus DMSO treated condition. (b) Number of cells normalized to DMSO treated condition.

**Figure S4: Cytotoxicity determination under compounds dose response.** The number of cells from the experiments shown in the figure 2d top panels (increasing doses of compounds) was determined for four enhancers of LNPs (a) and of Chol-siRNAs (b).

**Figure S5: BADGE and CPW1-J18 are both improving silencing by two different mechanisms.** (a) GFP down-regulation 72 h after transfection with LNP-siRNA (40 nM, top panels) and uptake of LNP-siRNA-alexa647 (40 nM, 5 h incubation, bottom panels) after treated with DMSO (right panels), BADGE (middle panels) or CPW1-J18 (right panels) in HeLa and HeLa GFP cells. (b,c) Quantification of the uptake of LNP-siRNA-alexa647 (c) and of GFP down-regulation (b) in HeLa and HeLa GFP cells. Mean  $\pm$  s.e.m. n=3 (\*\*Pvalue<0.01, \*\*\*Pvalue<0.001).

**Figure S6: BADGE treatment does not alter the mean number of siRNA-gold particles per LNPs.** Quantitative analysis of the number of siRNA-gold per LNPs after treatment with DMSO or BADGE. Mean  $\pm$  s.e.m. n=3 (Pvalue=0.88).

**Figure S7: Profile parameters for QMPIA on chemicals impact on EGF and transferrin endocytosis.** Description of the different parameters used to draw the endocytic profiles and exemplified here by hydroxychloroquine.

**Figure S8: Proposed lipid crosslinking mediated by reaction of BADGE with lipid head-groups.** Description of the proposed reaction between BADGE and the lipid head-groups.

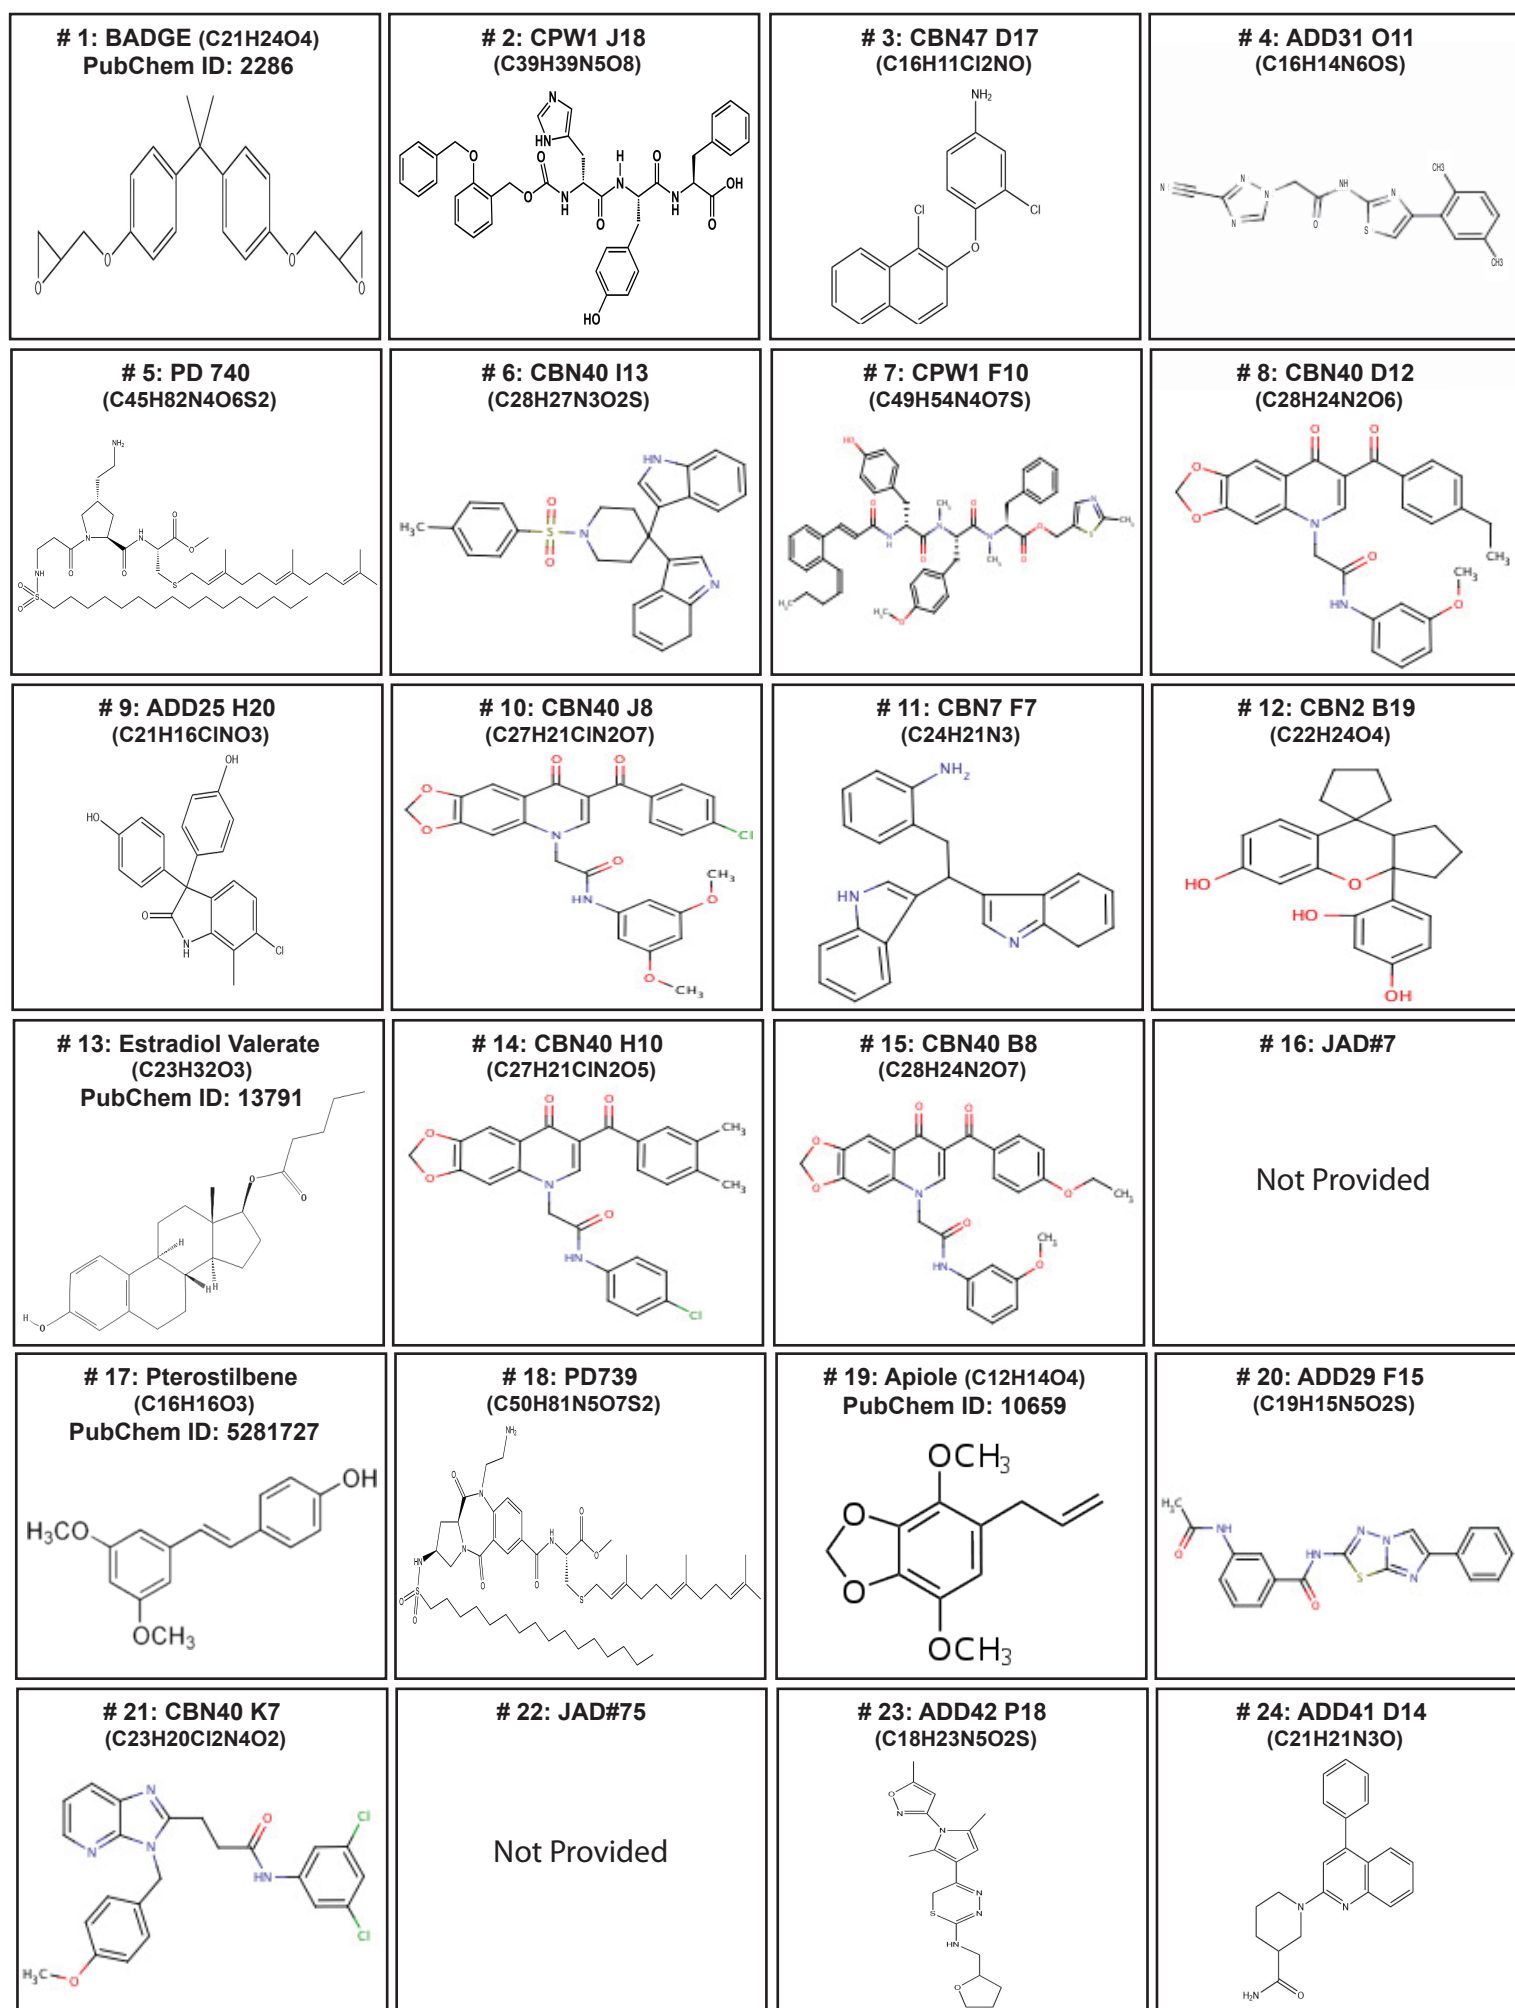

Figure S1a

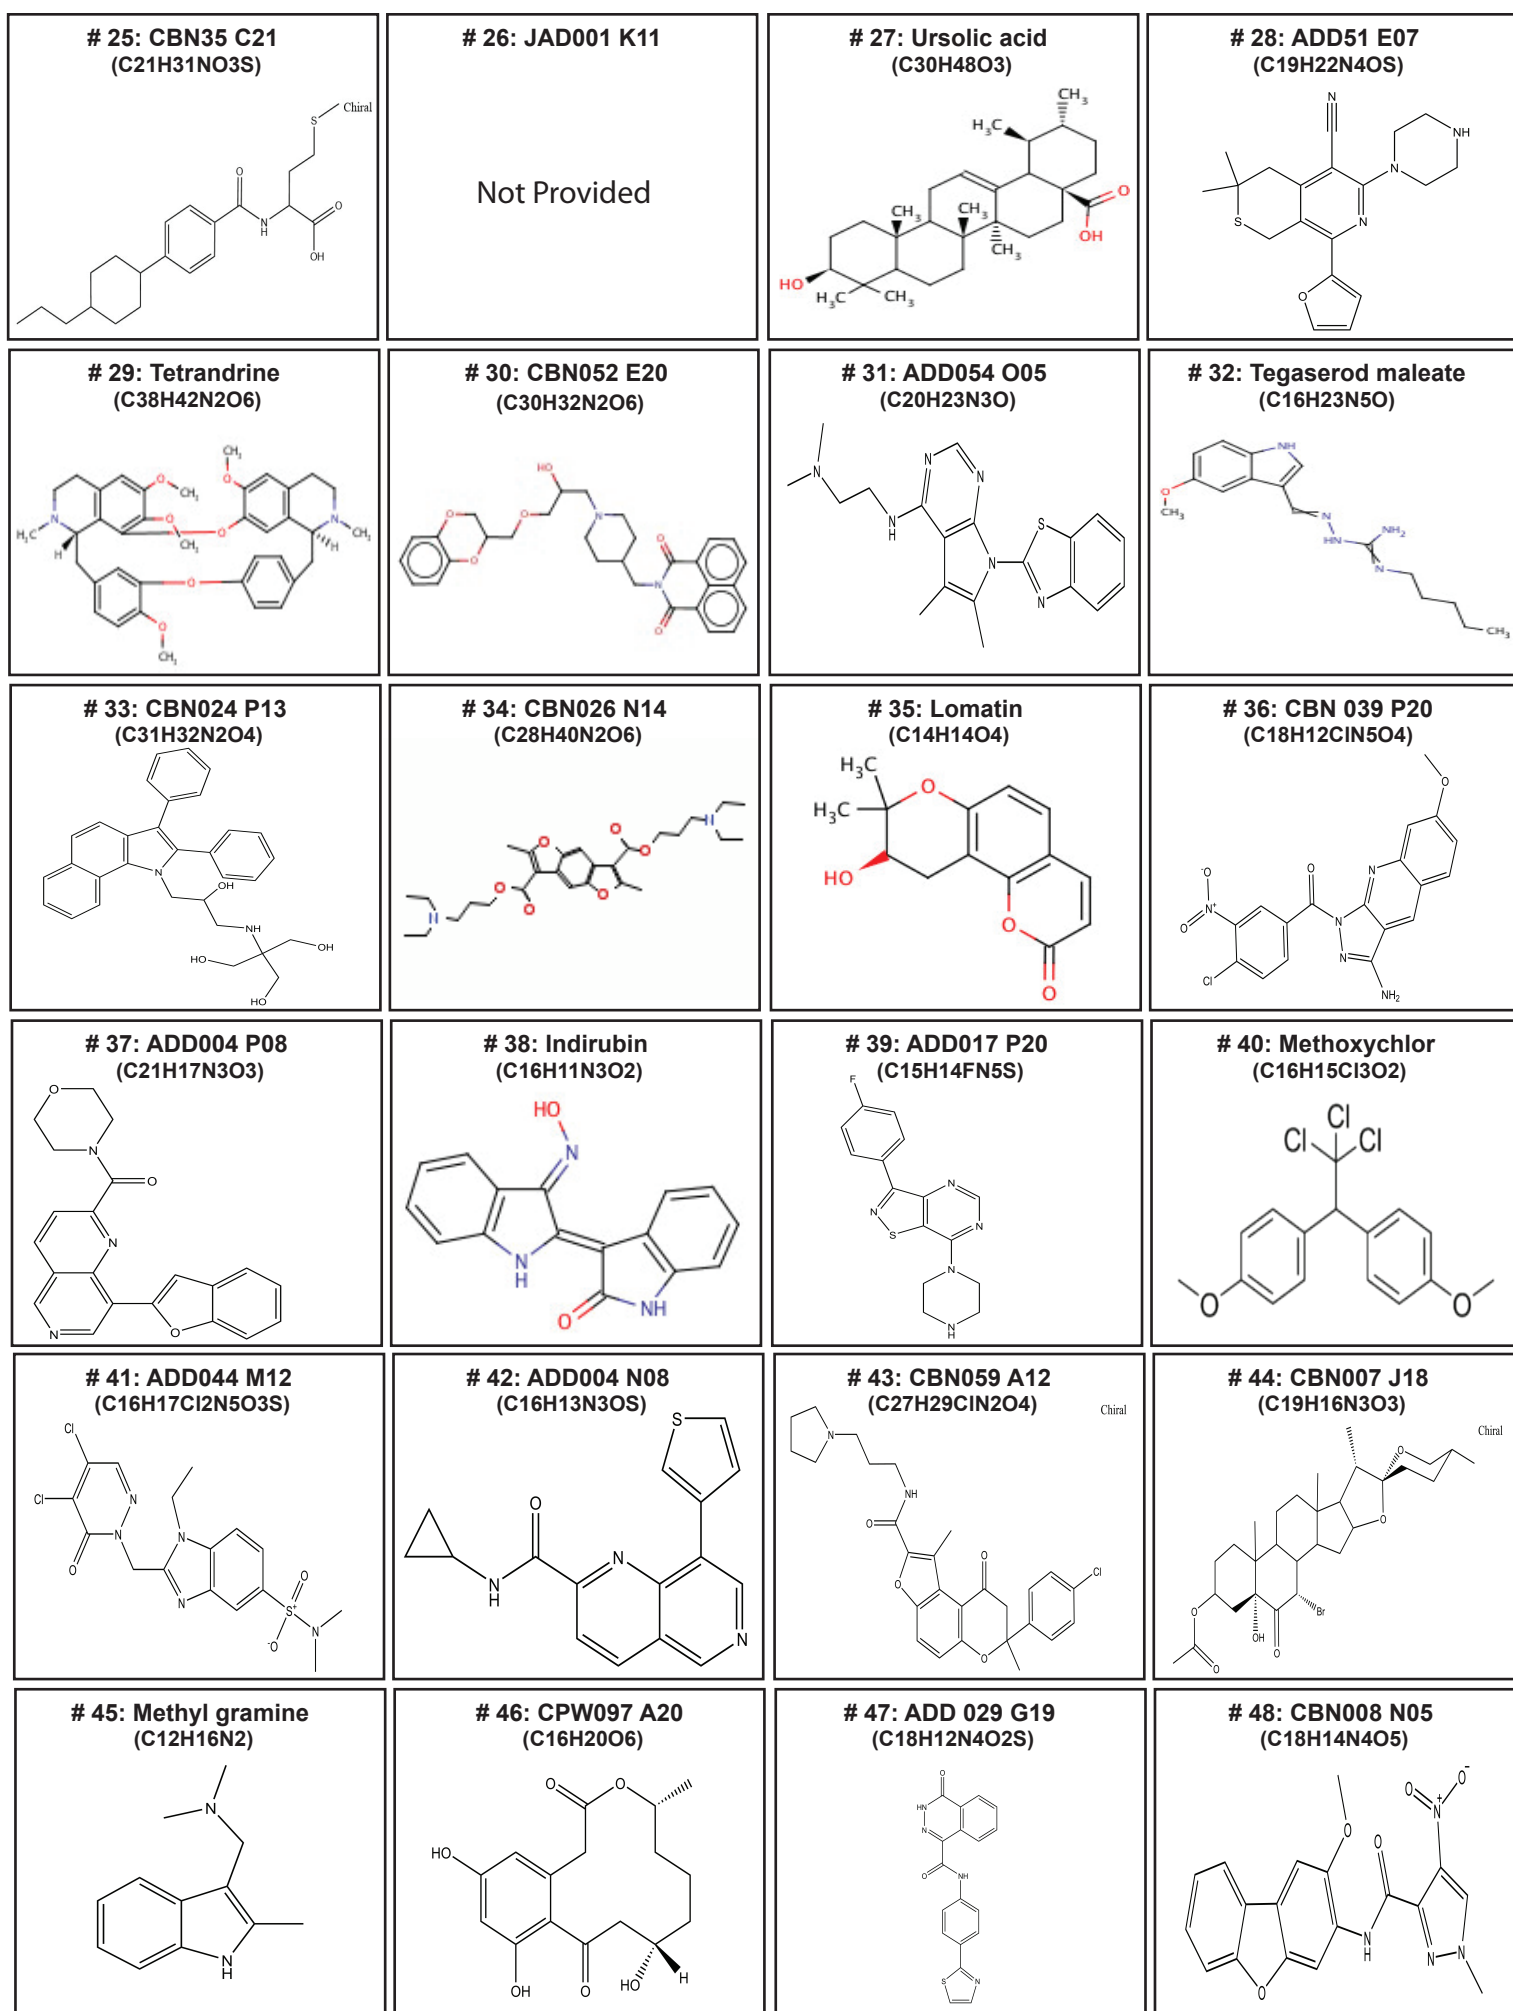

Figure S1b



**# 49: CBN034 A18**  
**(C<sub>21</sub>H<sub>17</sub>N<sub>5</sub>O<sub>2</sub>)**

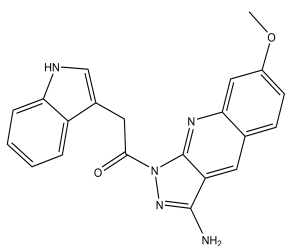

**# 50: CBN053 M19**  
**(C<sub>25</sub>H<sub>25</sub>N<sub>5</sub>O<sub>3</sub>S<sub>2</sub>)**

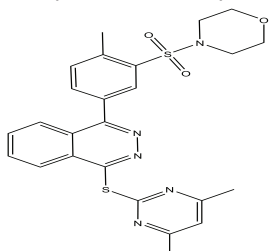

Figure S1c

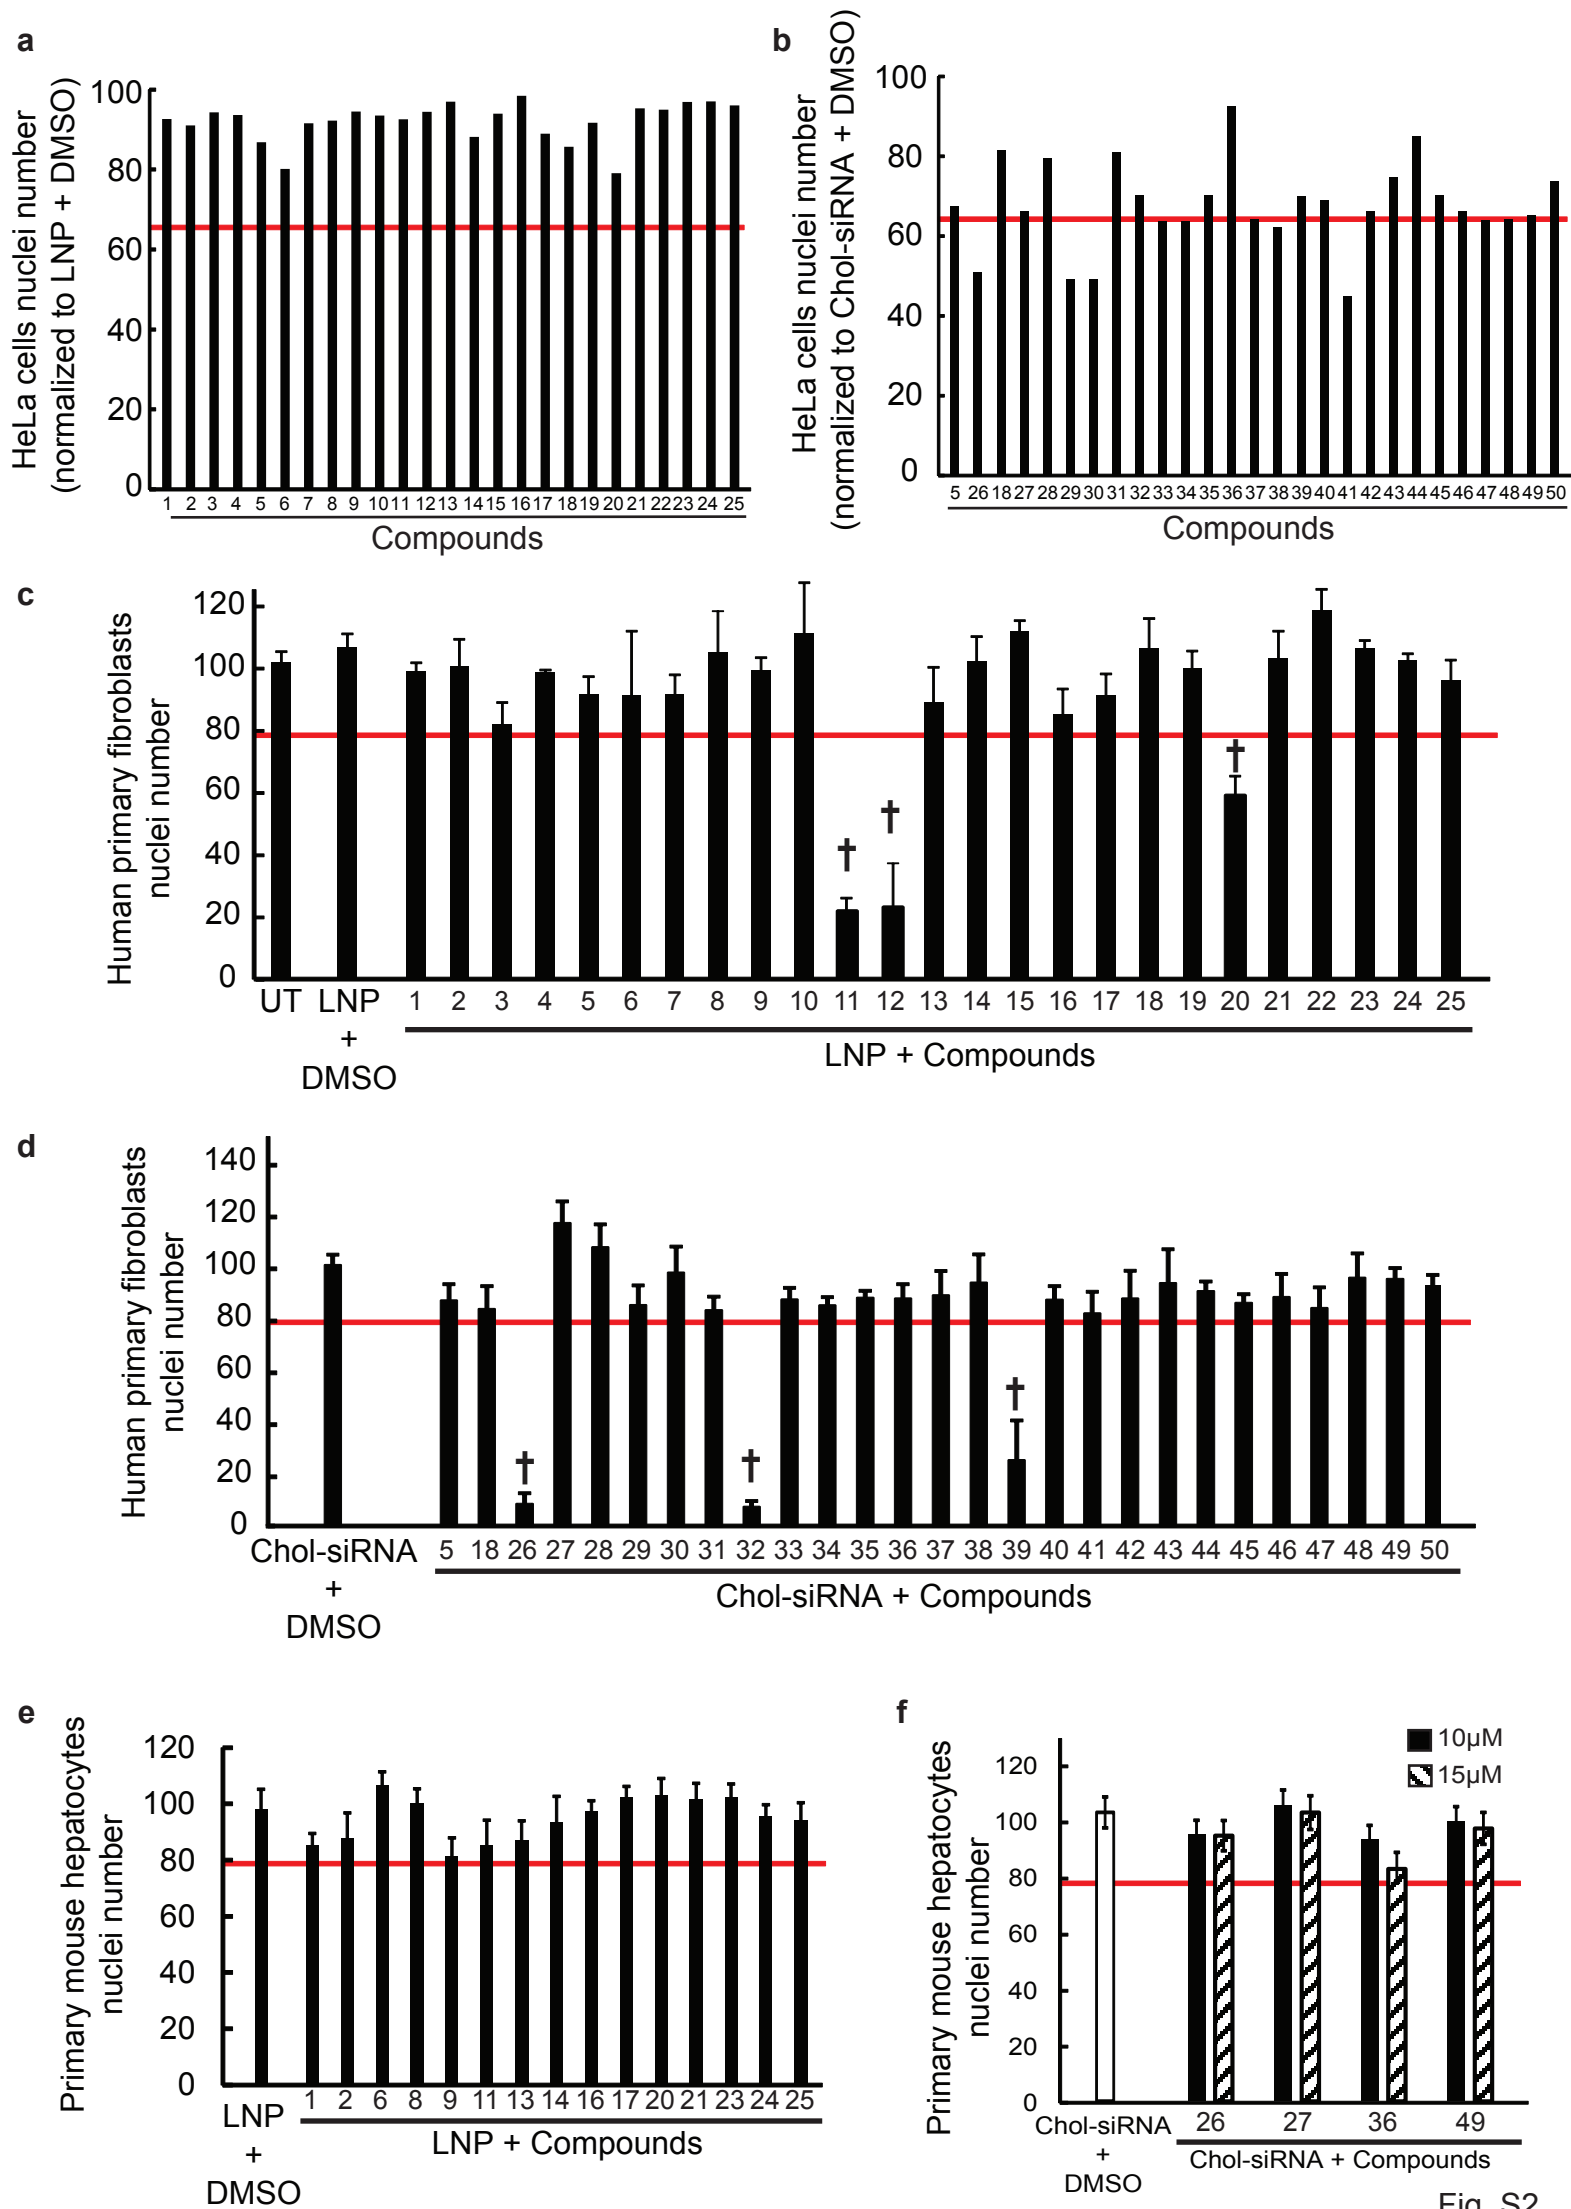

Fig. S2

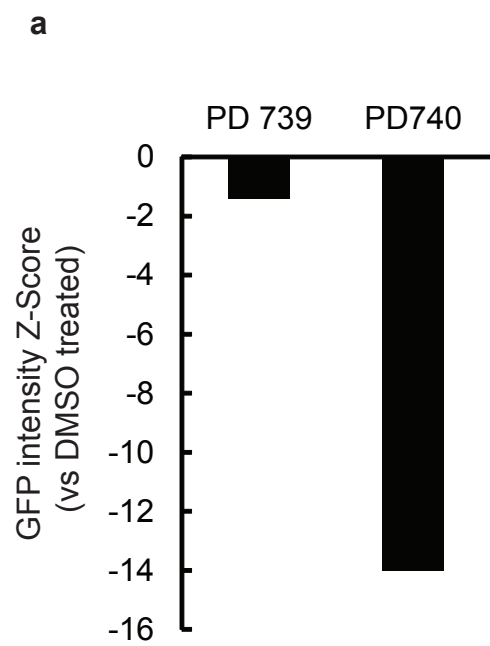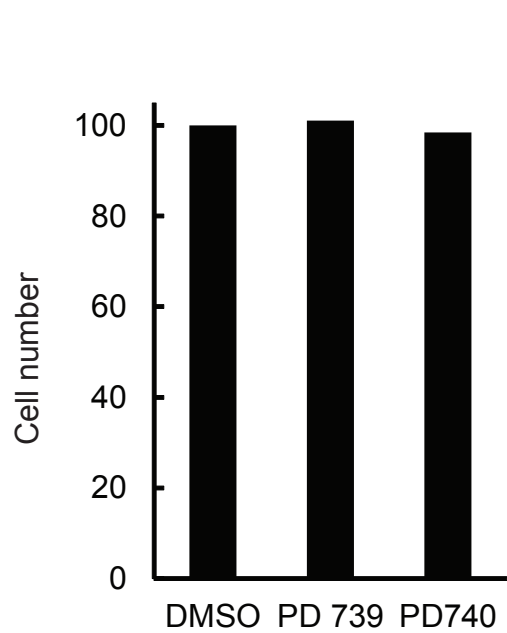

Fig. S3

a

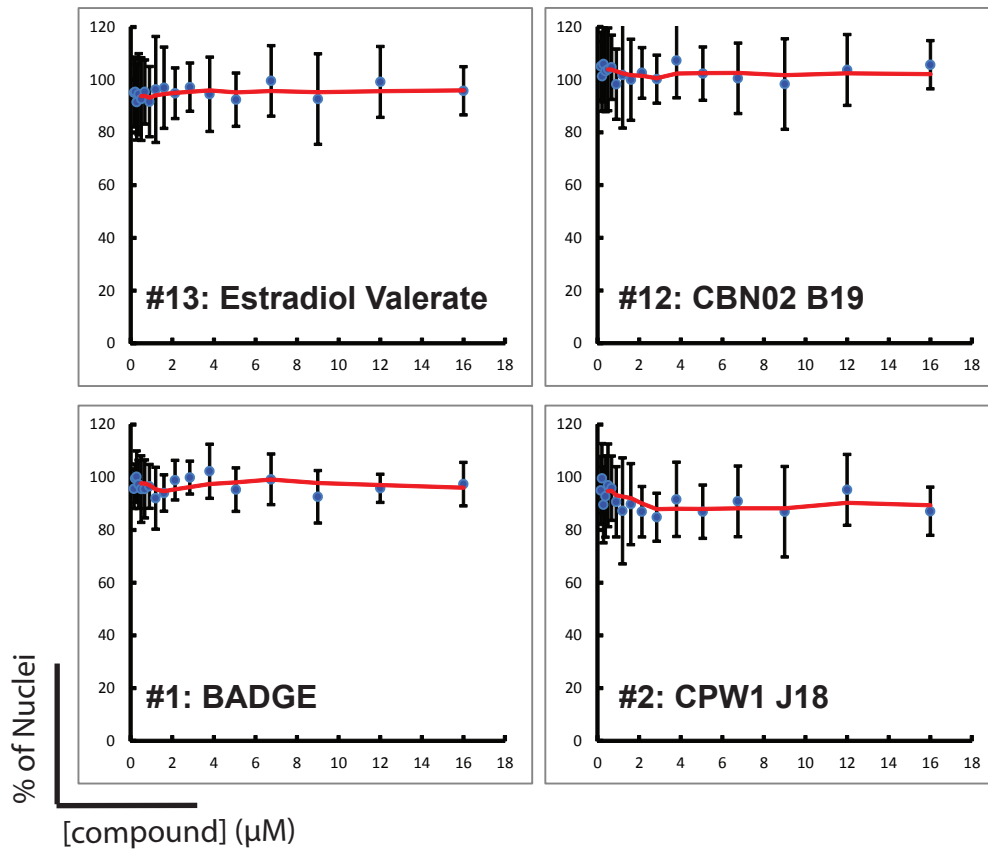

b

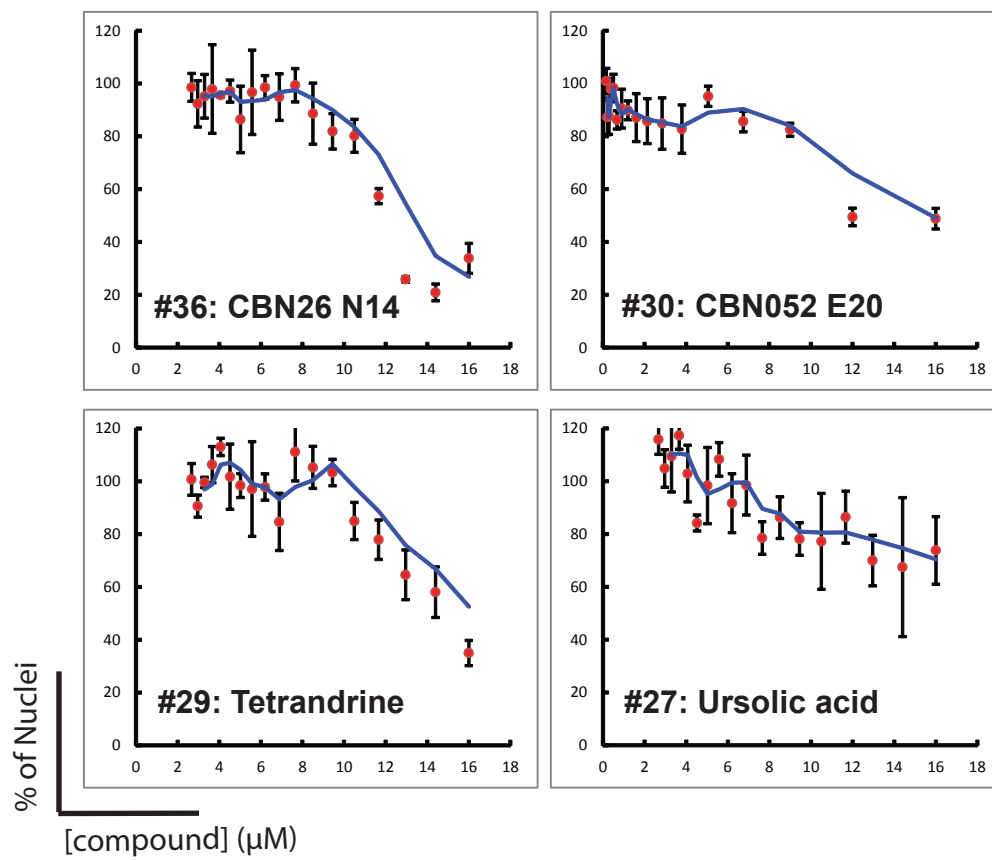

Fig. S4

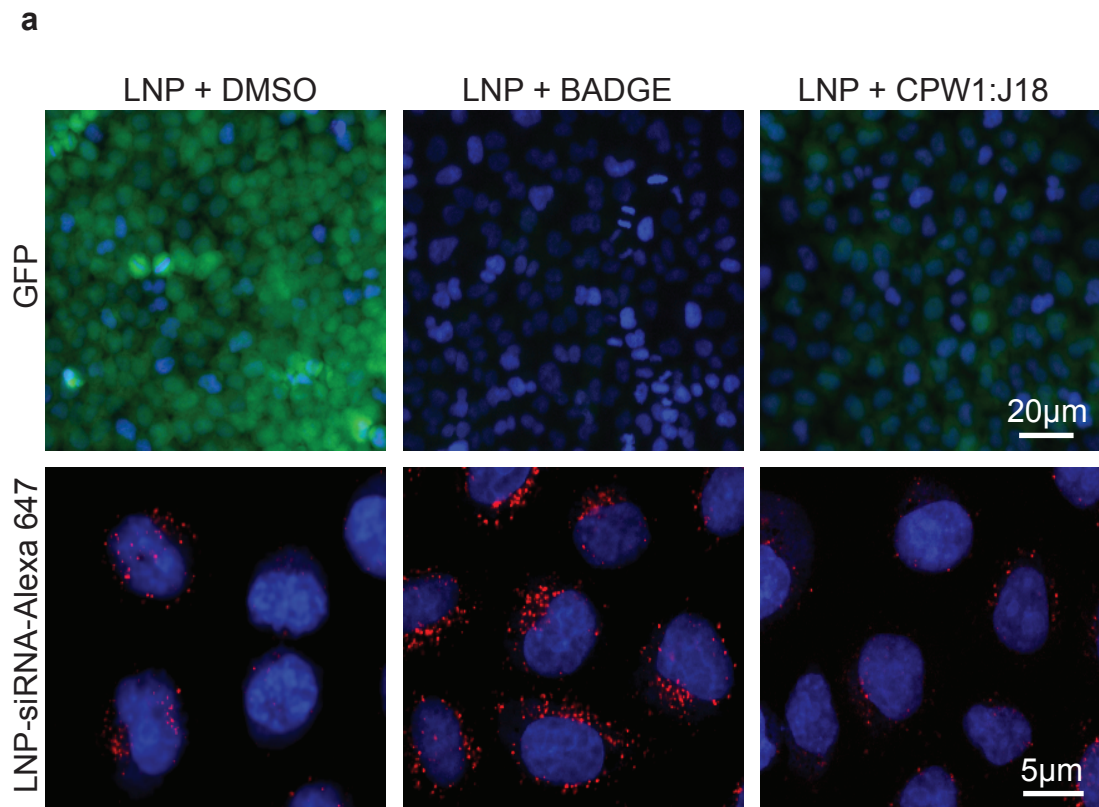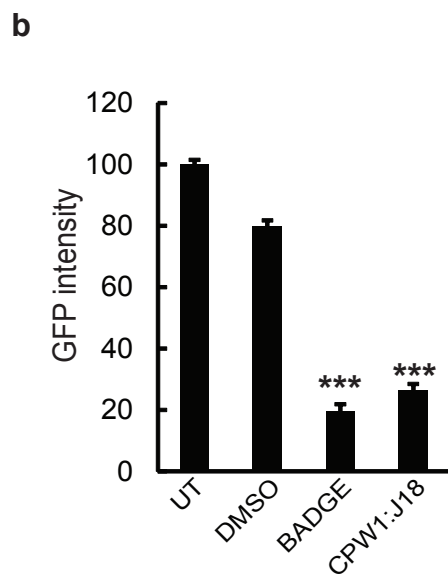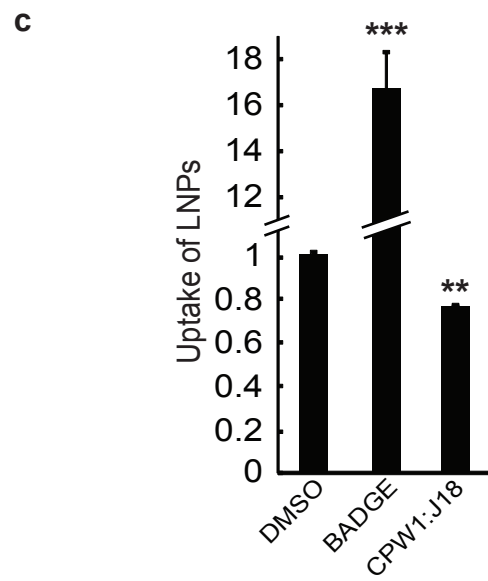

Figure S5

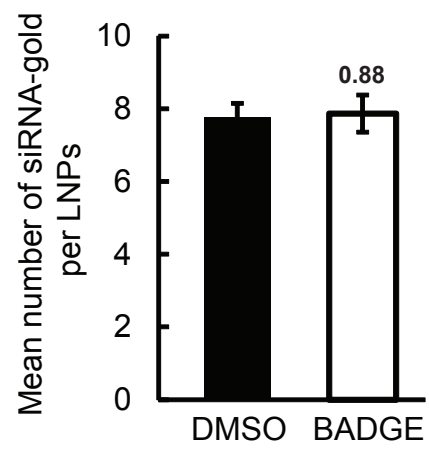

Figure S6

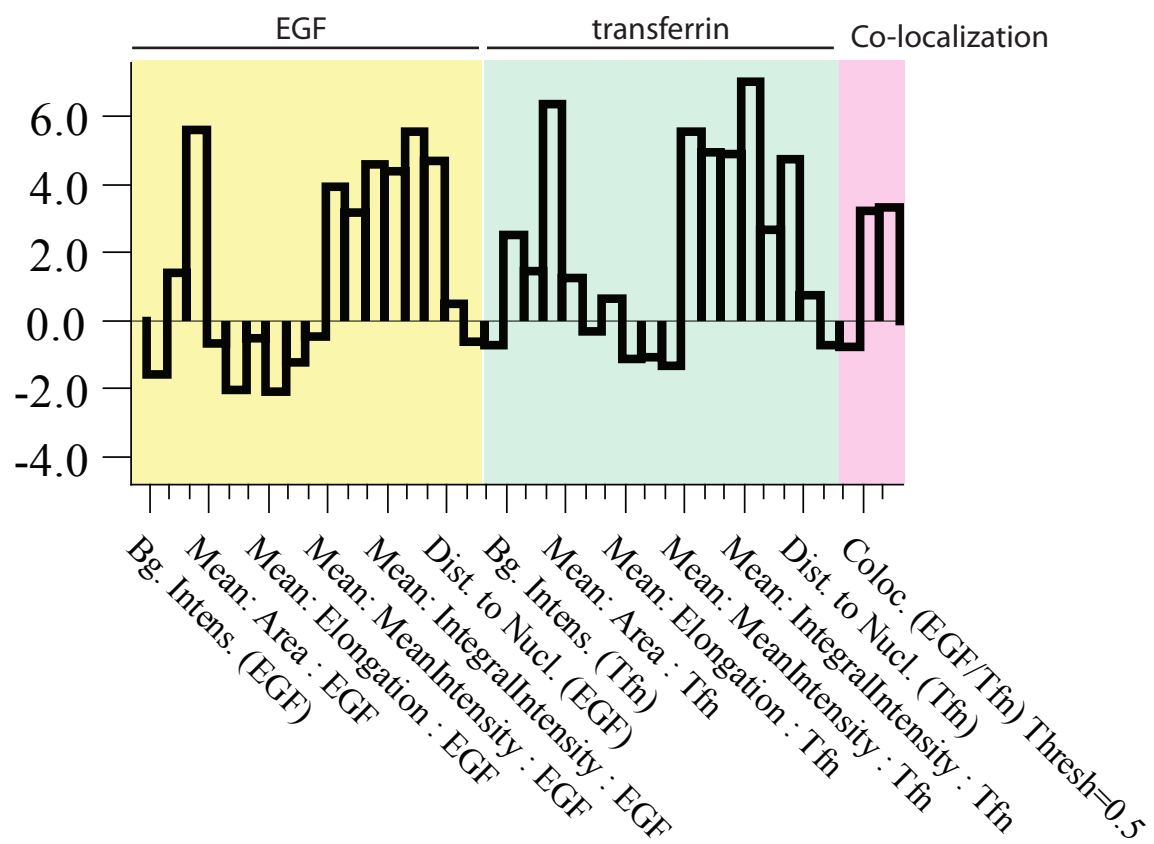

Figure S7

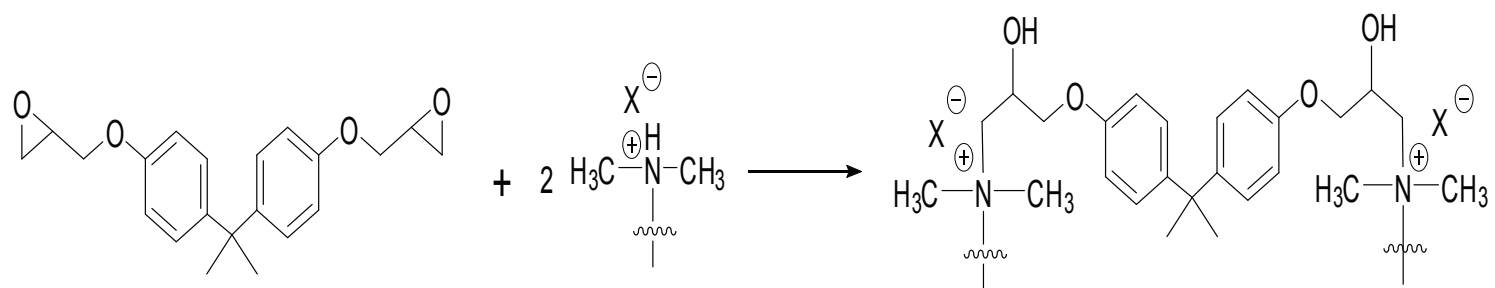

Figure S8
